# Supplementary material for: Sourdough Fermentation Favorably Influences Selenium Biotransformation and the Biological Effects of Flatbread
Source: MDPI journal article supplement (doi:10.3390/nu10121898), 2018-12-03
Supplement: s1 [file Figure Caption.docx]

Figure S1. Anion exchange HPLC-ICP-MS chromatogram of selenium species in the SFCF-TQ piadina gastrointestinal hydrolysate.

Figure S2. Anion exchange HPLC-ICP-MS chromatogram of selenium species in the SFSF-TQ piadina gastrointestinal hydrolysate.
